# Supplementary material for: ADAR3 expression is an independent prognostic factor in lower-grade diffuse gliomas and positively correlated with the editing level of GRIA2Q607R
Source: PubMed Central journal article supplement (PMC6276233; doi:10.1186/s12935-018-0695-8), 2018-12-03

**A**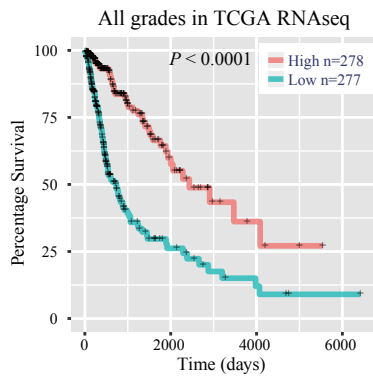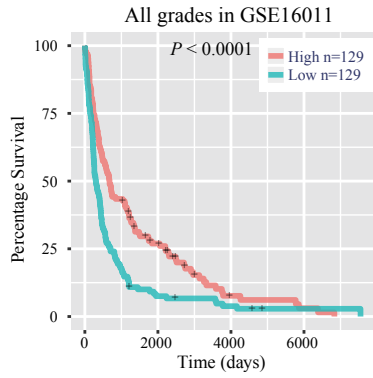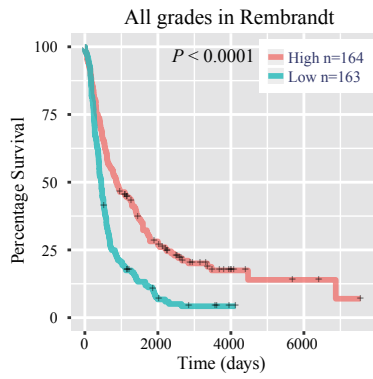**B**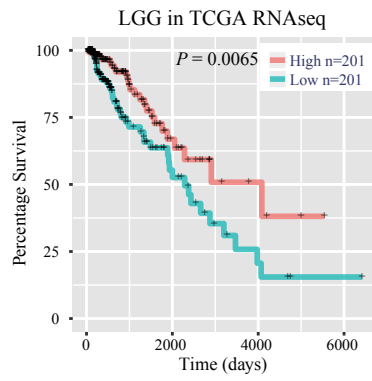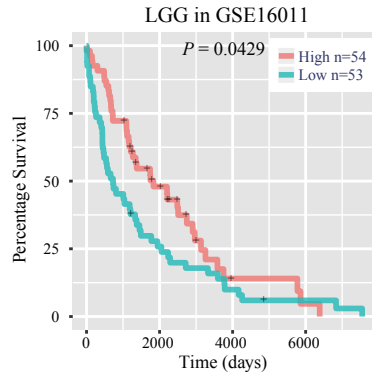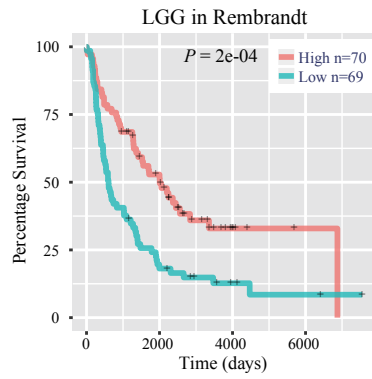**C**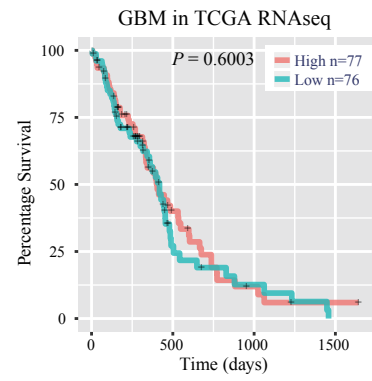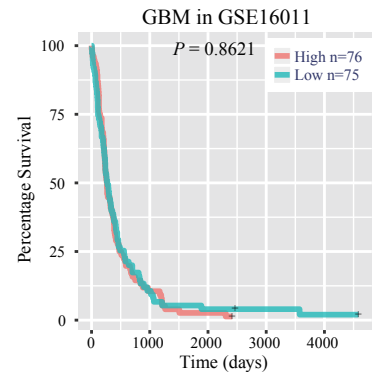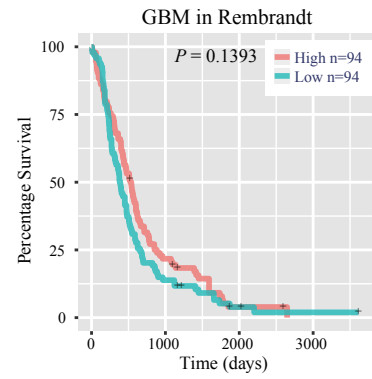

Supplement: 12935_2018_695_MOESM3_ESM.pdf [file 12935_2018_695_MOESM3_ESM.pdf]
